# Supplementary material for: A Probabilistic Model of RNA Conformational Space
Source: PubMed Central journal article supplement (PMC2691987; doi:10.1371/journal.pcbi.1000406), 2009-06-19
Supplement: pcbi.1000406.s005.pdf [file pcbi.1000406.s005.pdf]

**Table S3. Execution time of the MCMC algorithm.**

| Structure description | BARNACLE |     | Mixture model  | Uniform model  | Number of      |                   |
|-----------------------|----------|-----|----------------|----------------|----------------|-------------------|
| PDB ID                | Len      | Bps | Execution time | Execution time | Execution time | MCMC steps        |
|                       |          |     | (hours)        | (hours)        | (hours)        |                   |
| 1ESY                  | 19       | 6   | 14.1           | 11.9           | 80.4           | $11.8 \cdot 10^6$ |
| 1KKA                  | 17       | 6   | 10.8           | 9.7            | 53.7           | $10.6 \cdot 10^6$ |
| 1L2X                  | 27       | 8   | 29.4           | 25.4           | 147.0          | $16.9 \cdot 10^6$ |
| 1Q9A                  | 27       | 6   | 27.2           | 20.6           | 92.9           | $16.9 \cdot 10^6$ |
| 1QWA                  | 21       | 8   | 23.4           | 15.3           | 76.8           | $13.1 \cdot 10^6$ |
| 1XJR                  | 46       | 15  | 185.5          | 147.3          | 2450.7         | $57.6 \cdot 10^6$ |
| 1ZIH                  | 12       | 4   | 8.8            | 4.8            | 20.0           | $7.5 \cdot 10^6$  |
| 28SP                  | 28       | 8   | 39.3           | 27.6           | 143.3          | $17.5 \cdot 10^6$ |
| 2A43                  | 26       | 7   | 24.0           | 23.6           | 108.2          | $16.2 \cdot 10^6$ |
| 2F88                  | 34       | 13  | 52.1           | 40.7           | 213.4          | $21.2 \cdot 10^6$ |

The table shows the number of steps used in the MCMC algorithm and its executions time. *Len*: the number of nucleotides in the molecule; *Bps*: the number of Watson Crick and G-U wobble base pairs in the structure; *Execution time*: the execution time on a 2.6Ghz Intel Core 2 processor (using a single core) of a Python implementation of BARNACLE; *Number of MCMC steps*: the number of steps used in the MCMC algorithm.
